# Supplementary material for: Recent advances in rehabilitation for Parkinson’s Disease with Exergames: A Systematic Review
Source: PubMed Central journal article supplement (PMC6352377; doi:10.1186/s12984-019-0492-1), 2019-01-29
Supplement: 12984_2019_492_MOESM1_ESM.pdf [file 12984_2019_492_MOESM1_ESM.pdf]

**Supplementary Table 1: Overview of the selected RCTs and Pilot Studies**

| Clinical Trials                     | Authors                                                                                                                 | Title                                                                                                                                                                                  | Journal                                                                                                                          |
|-------------------------------------|-------------------------------------------------------------------------------------------------------------------------|----------------------------------------------------------------------------------------------------------------------------------------------------------------------------------------|----------------------------------------------------------------------------------------------------------------------------------|
| Pompeu et al. (2012) [35]           | J. E. Pompeu, F. A. dos Santos Mendes, K. G. da Silva, A. M. Lobo, T. de Paula Oliveira, A. P. Zomignani, <i>et al.</i> | Effect of Nintendo Wii™-based motor and cognitive training on activities of daily living in patients with Parkinson's disease: A randomised clinical trial.                            | <i>Physiotherapy</i> , vol. 98, pp. 196-204, 2012.                                                                               |
| Allen et al. (2017) [36]            | N. E. Allen, J. Song, S. S. Paul, S. Smith, J. O'Duffy, M. Schmidt, <i>et al.</i>                                       | An interactive videogame for arm and hand exercise in people with Parkinson's disease: A randomized controlled trial.                                                                  | <i>Parkinsonism &amp; Related Disorders</i> , 2017.                                                                              |
| Liao et al. (2015) [37]             | Y.-Y. Liao, Y.-R. Yang, S.-J. Cheng, Y.-R. Wu, J.-L. Fuh, and R.-Y. Wang.                                               | Virtual reality-based training to improve obstacle-crossing performance and dynamic balance in patients with Parkinson's disease.                                                      | <i>Neurorehabilitation and neural repair</i> , vol. 29, pp. 658-667, 2015.                                                       |
| Shih et al. (2016) [38]             | M.-C. Shih, R.-Y. Wang, S.-J. Cheng, and Y.-R. Yang.                                                                    | Effects of a balance-based exergaming intervention using the Kinect sensor on posture stability in individuals with Parkinson's disease: a single-blinded randomized controlled trial. | <i>Journal of neuroengineering and rehabilitation</i> , vol. 13, p. 78, 2016.                                                    |
| Ribas et al. (2017) [39]            | C. G. Ribas, L. A. da Silva, M. R. Corrêa, H. G. Teive, and S. Valderramas.                                             | Effectiveness of exergaming in improving functional balance, fatigue and quality of life in Parkinson's disease: A pilot randomized controlled trial.                                  | <i>Parkinsonism &amp; Related Disorders</i> , 2017.                                                                              |
| Zimmermann et al. (2014) [40]       | R. Zimmermann, U. Gschwandtner, N. Benz, F. Hatz, C. Schindler, E. Taub, <i>et al.</i>                                  | Cognitive training in Parkinson disease Cognition-specific vs nonspecific computer training .                                                                                          | <i>Neurology</i> , vol. 82, pp. 1219-1226, 2014.                                                                                 |
| Song et al. (2017) [41]             | J. Song, S. S. Paul, M. J. D. Caetano, S. Smith, L. E. Dibble, R. Love, <i>et al.</i>                                   | Home-based step training using videogame technology in people with Parkinson's disease: a single-blinded randomised controlled trial.                                                  | <i>Clinical rehabilitation</i> , p. 0269215517721593, 2017.                                                                      |
| Ferraz et al. (2018) [42]           | D. D. Ferraz, K. V. Trippo, G. P. Duarte, M. G. Neto, K. O. B. Santos, and J. Oliveira Filho.                           | The effects of functional training, bicycle exercise and exergaming on walking capacity of elderly with Parkinson's disease: a pilot randomized controlled single-blinded trial.       | <i>Archives of physical medicine and rehabilitation</i> , 2018.                                                                  |
| Tollar et al. (2018) [43]           | J. Tollar, F. Nagy and T. Hortobagyi                                                                                    | Vastly different exercise programs similarly improve parkinsonian symptoms: A randomized clinical trial                                                                                | <i>Gerontology</i> , pp. 1-8, 2018                                                                                               |
| Pilot Studies                       | Authors                                                                                                                 | Title                                                                                                                                                                                  | Journal                                                                                                                          |
| Summa et al. (2013) [44]            | S. Summa, A. Basteris, E. Betti, and V. Sanguineti                                                                      | A feasibility study on using kinect™ for the rehabilitation in persons with Parkinson's disease.                                                                                       | <i>Gait &amp; Posture</i> , vol. 37, p. S15, 2013.                                                                               |
| Palacios-Navarro et al. (2015) [45] | G. Palacios-Navarro, I. Garcia-Magariño, and P. Ramos-Lorente,                                                          | A Kinect-based system for lower limb rehabilitation in Parkinson's disease patients: a pilot study.                                                                                    | <i>Journal of medical systems</i> , vol. 39, p. 103, 2015.                                                                       |
| Summa et al. (2015) [46]            | S. Summa, A. Basteris, E. Betti, and V. Sanguineti,                                                                     | Adaptive training with full-body movements to reduce bradykinesia in persons with Parkinson's disease: a pilot study.                                                                  | <i>Journal of neuroengineering and rehabilitation</i> , vol. 12, p. 16, 2015.                                                    |
| Goncalves et al. (2014) [47]        | G. B. Gonçalves, M. A. A. Leite, M. Orsini, and J. S. Pereira,                                                          | Effects of using the nintendo wii fit plus platform in the sensorimotor training of gait disorders.                                                                                    | Parkinson's disease," <i>Neurology international</i> , vol. 6, 2014.                                                             |
| Pompeu et al. (2015) [48]           | J. E. Pompeu, C. Torriani-Pasin, F. Doná, F. F. Ganança, K. G. da Silva, and H. B. Ferraz,                              | Effect of Kinect games in postural control of patients with Parkinson's disease.                                                                                                       | <i>Proceedings of the 3rd 2015 Workshop on ICTs for improving Patients Rehabilitation Research Techniques</i> , 2015, pp. 54-57. |
| Pompeu et al. (2014) [49]           | J. Pompeu, L. Arduini, A. Botelho, M. Fonseca, S. A. A. Pompeu, C. Torriani-Pasin, <i>et al.</i> ,                      | Feasibility, safety and outcomes of playing Kinect Adventures!™ for people with Parkinson's disease: a pilot study.                                                                    | <i>Physiotherapy</i> , vol. 100, pp. 162-168, 2014.                                                                              |
| Negrini et al. (2017) [50]          | S. Negrini, L. Bissolotti, A. Ferraris, F. Noro, M. D. Bishop, and J. H. Villafañe                                      | Nintendo Wii Fit for balance rehabilitation in patients with Parkinson's disease: A comparative study.                                                                                 | <i>Journal of Bodywork and Movement Therapies</i> , vol. 21, pp. 117-123, 2017.                                                  |
| Nuic et al. (2018) [51]             | D. Nuic, M. Vinti, C. Karachi, P. Foulon, A. Van Hamme and M.-L. Welter                                                 | The feasibility and positive effects of a customised videogame rehabilitation programme for freezing of gait and falls in Parkinson's Disease patients: A                              | <i>Journal of Neuroengineering and Rehabilitation</i> , vol. 15, p.31, 2018                                                      |

|                            |                                                                                                                     |                                                                                                                                                                          |                                                                                |
|----------------------------|---------------------------------------------------------------------------------------------------------------------|--------------------------------------------------------------------------------------------------------------------------------------------------------------------------|--------------------------------------------------------------------------------|
|                            |                                                                                                                     | pilot study                                                                                                                                                              |                                                                                |
| Cikajlo et al. (2018) [52] | Cikajlo, A. Hukic, I. Dolinsek, D. Zajc, M. Vesel, T. Krizmanik, B. Blazica, A. Biasizzo, F. Novak and K. P. Potisk | Can telerehabilitation games lead to functional improvement of upper extremities in individuals with Parkinson's Disease?                                                | <i>International Journal of Rehabilitation Research</i> , vol. 41, p.230, 2018 |
| Pradhan (2018) [53]        | S. Pradhan                                                                                                          | The use of commercially available games for a combined physical and cognitive challenge during exercise for individuals with Parkinson's Disease – a case series report" | <i>Physiotherapy theory and practice</i> , pp. 1-8, 2018                       |
| Alves et al. (2018) [54]   | M.L. Alves, B.S. Mesquita, W.S. Morais, J.C. Leal, C.E. Sattler and F.A. dos Santos Mendes                          | Nintendo Wii versus Xbox Kinect for assisting people with Parkinson's Disease                                                                                            | <i>Perceptual and motor skills</i> , vol. 125, pp. 546-565, 2018               |
